# Supplementary material for: Playing in ‘The Backyard’: Environmental Features and Conditions of a Natural Playspace Which Support Diverse Outdoor Play Activities among Younger Children
Source: MDPI journal article supplement (doi:10.3390/ijerph191912661), 2022-10-03
Supplement: s1 [file s1]

Supplementary Materials

Figure S1. Behavior Map of all Bio, Expressive, Restorative & Digital Play Activities.

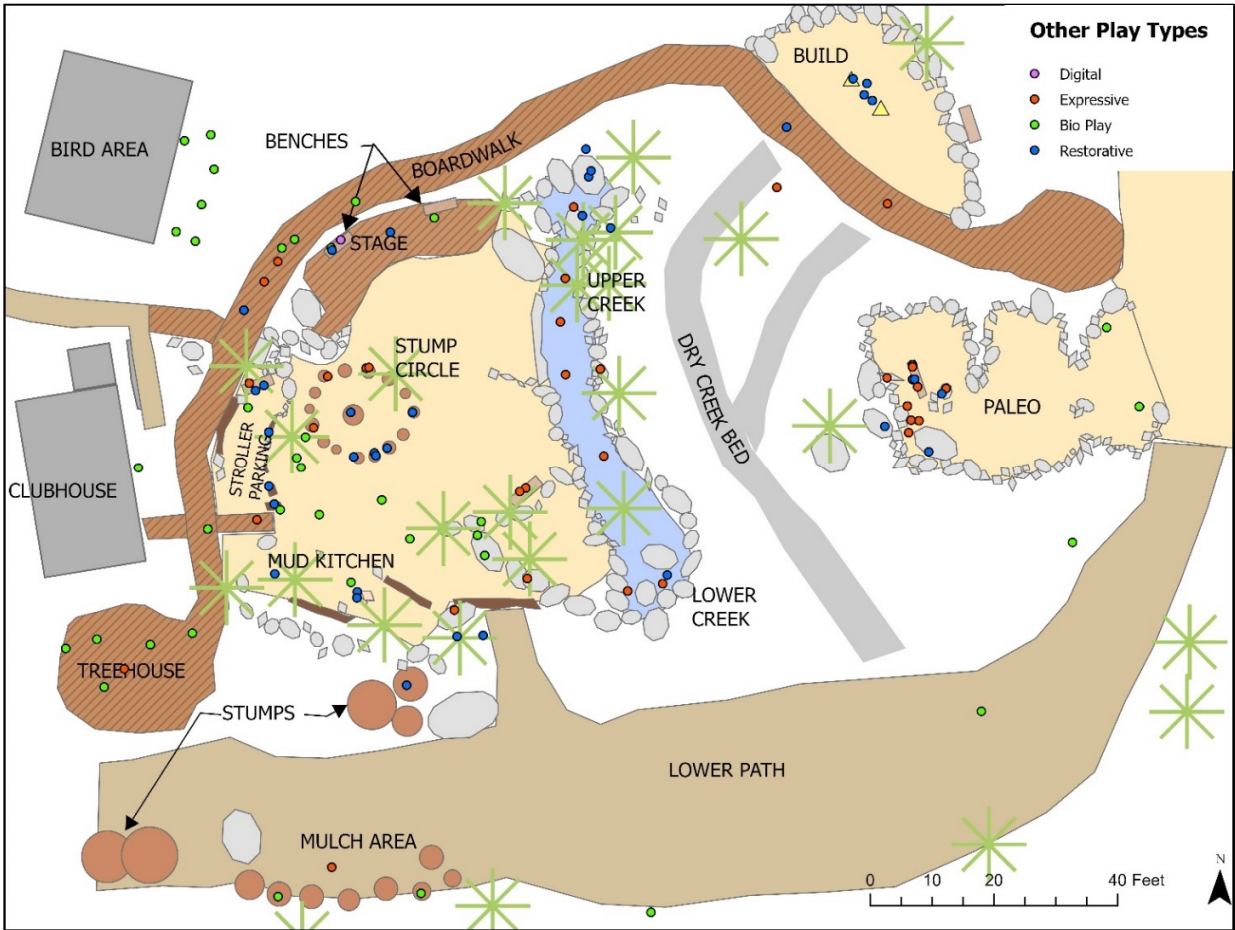

**Table S1.** Two-Way Associations between Outdoor Play Types and Select Demographic, Behavioral and Environmental Variables

|                       | OUTDOOR PLAY TYPES |             |             |                 |      |            |             |         |          |       |
|-----------------------|--------------------|-------------|-------------|-----------------|------|------------|-------------|---------|----------|-------|
|                       | Physical           | Exploratory | Imaginative | Play with Rules | Bio  | Expressive | Restorative | Digital | Non-play | Total |
| <b>GENDER</b>         |                    |             |             |                 |      |            |             |         |          |       |
| Male (n)              | 280                | 249         | 35          | 38              | 20   | 10         | 14          | 1       | 54       | 701   |
| % across all OPTs     | 39.9               | 35.5        | 5.0         | 5.4             | 2.9  | 1.4        | 2.0         | 0.1     | 7.7      |       |
| % within OPT          | 64.5               | 59.9        | 52.2        | 80.9            | 51.3 | 28.6       | 38.9        | 100.0   | 44.3     |       |
| Female (n)            | 154                | 167         | 32          | 9               | 19   | 25         | 22          | 0       | 68       | 496   |
| % across all OPTs     | 31.0               | 33.7        | 6.5         | 1.8             | 3.8  | 5.0        | 4.4         | 0.0     | 13.7     |       |
| % within OPT          | 35.5               | 40.1        | 47.8        | 19.2            | 48.7 | 71.4       | 61.1        | 0.0     | 55.7     |       |
| <b>AGE</b>            |                    |             |             |                 |      |            |             |         |          |       |
| 3-8 years old (n)     | 368                | 364         | 67          | 47              | 38   | 33         | 31          | 1       | 104      | 1053  |
| % across all OPTs     | 34.9               | 34.6        | 6.4         | 4.5             | 3.6  | 3.1        | 2.9         | 0.1     | 9.9      |       |
| % within OPT          | 84.8               | 87.5        | 100.0       | 100.0           | 97.4 | 94.3       | 86.1        | 100.0   | 85.3     |       |
| 0-2 years old (n)     | 66                 | 52          | 0           | 0               | 1    | 2          | 5           | 0       | 18       | 144   |
| % across all OPTs     | 45.8               | 36.1        | 0.0         | 0.0             | 0.7  | 1.4        | 3.5         | 0.0     | 12.5     |       |
| % within OPT          | 15.2               | 12.5        | 0.0         | 0.0             | 2.6  | 5.7        | 13.9        | 0.0     | 14.8     |       |
| <b>CARS CONDENSED</b> |                    |             |             |                 |      |            |             |         |          |       |
| Stationary (n)        | 93                 | 174         | 29          | 7               | 31   | 24         | 30          | 1       | 62       | 451   |
| % across all OPTs     | 20.6               | 38.6        | 6.4         | 1.6             | 6.9  | 5.3        | 6.7         | 0.2     | 13.7     |       |
| % within OPT          | 21.4               | 41.8        | 43.3        | 14.9            | 79.5 | 68.6       | 83.3        | 100.0   | 50.8     |       |
| Slow (n)              | 158                | 162         | 24          | 17              | 6    | 3          | 5           | 0       | 25       | 400   |
| % across all OPTs     | 39.5               | 40.5        | 6.0         | 4.3             | 1.5  | 0.8        | 1.3         | 0.0     | 6.3      |       |
| % within OPT          | 36.4               | 38.9        | 35.8        | 36.2            | 15.4 | 8.6        | 13.9        | 0.0     | 20.5     |       |
| Moderate-Vigorous (n) | 183                | 80          | 14          | 23              | 2    | 8          | 1           | 0       | 35       | 346   |
| % across all OPTs     | 52.9               | 23.1        | 4.0         | 6.6             | 0.6  | 2.3        | 0.3         | 0.0     | 10.1     |       |
| % within OPT          | 42.2               | 19.2        | 20.9        | 48.9            | 5.1  | 22.9       | 2.8         | 0.0     | 28.7     |       |
| <b>RISK CONDENSED</b> |                    |             |             |                 |      |            |             |         |          |       |
| No/Low Risk (n)       | 117                | 216         | 47          | 8               | 35   | 25         | 27          | 1       | 103      | 579   |
| % across all OPTs     | 20.2               | 37.3        | 8.1         | 1.4             | 6.0  | 4.3        | 4.7         | 0.2     | 17.8     |       |
| % within OPT          | 27.0               | 51.9        | 70.2        | 17.0            | 89.7 | 71.4       | 75.0        | 100.0   | 84.4     |       |
| Positive Risk (n)     | 312                | 199         | 20          | 39              | 4    | 10         | 9           | 0       | 19       | 612   |
| % across all OPTs     | 51.0               | 32.5        | 3.3         | 6.4             | 0.7  | 1.6        | 1.5         | 0.0     | 3.1      |       |
| % within OPT          | 71.9               | 47.8        | 29.9        | 83.0            | 10.3 | 28.6       | 25.0        | 0.0     | 15.6     |       |
| Negative Risk (n)     | 5                  | 1           | 0           | 0               | 0    | 0          | 0           | 0       | 0        | 6     |
| % across all OPTs     | 83.3               | 16.7        | 0.0         | 0.0             | 0.0  | 0.0        | 0.0         | 0.0     | 0.0      |       |

|              |     |     |     |     |     |     |     |     |     |  |
|--------------|-----|-----|-----|-----|-----|-----|-----|-----|-----|--|
| % within OPT | 1.2 | 0.2 | 0.0 | 0.0 | 0.0 | 0.0 | 0.0 | 0.0 | 0.0 |  |
|--------------|-----|-----|-----|-----|-----|-----|-----|-----|-----|--|

|                                   | OUTDOOR PLAY TYPES |             |             |                 |      |            |             |         |          |       |
|-----------------------------------|--------------------|-------------|-------------|-----------------|------|------------|-------------|---------|----------|-------|
|                                   | Physical           | Exploratory | Imaginative | Play with Rules | Bio  | Expressive | Restorative | Digital | Non-play | Total |
| INVOLVED LOOSE PARTS              |                    |             |             |                 |      |            |             |         |          |       |
| Yes (n)                           | 323                | 374         | 59          | 39              | 27   | 13         | 19          | 1       | 48       | 903   |
| % across all OPTs                 | 35.8               | 41.4        | 6.5         | 4.3             | 3.0  | 1.4        | 2.1         | 0.1     | 5.3      |       |
| % within OPT                      | 74.4               | 89.9        | 88.1        | 83.0            | 69.2 | 37.1       | 52.8        | 100.0   | 39.3     |       |
| No (n)                            | 111                | 42          | 8           | 8               | 12   | 22         | 17          | 0       | 74       | 294   |
| % across all OPTs                 | 37.8               | 14.3        | 2.7         | 2.7             | 4.1  | 7.5        | 5.8         | 0.0     | 25.2     |       |
| % within OPT                      | 25.6               | 10.1        | 11.9        | 17.0            | 30.8 | 62.9       | 47.2        | 0.0     | 60.7     |       |
| INVOLVED NATURAL LOOSE PARTS      |                    |             |             |                 |      |            |             |         |          |       |
| Yes (n)                           | 282                | 335         | 56          | 35              | 26   | 9          | 16          | 1       | 34       | 794   |
| % across all OPTs                 | 35.5               | 42.2        | 7.1         | 4.4             | 3.3  | 1.1        | 2.0         | 0.1     | 4.3      |       |
| % within OPT                      | 65.0               | 80.5        | 83.6        | 74.5            | 66.7 | 25.7       | 44.4        | 100.0   | 27.9     |       |
| No (n)                            | 152                | 81          | 11          | 12              | 13   | 26         | 20          | 0       | 88       | 403   |
| % across all OPTs                 | 37.7               | 20.1        | 2.7         | 3.0             | 3.2  | 6.5        | 5.0         | 0.0     | 21.8     |       |
| % within OPT                      | 35.0               | 19.5        | 16.4        | 25.5            | 33.3 | 74.3       | 55.6        | 0.0     | 72.1     |       |
| INVOLVED MANUFACTURED LOOSE PARTS |                    |             |             |                 |      |            |             |         |          |       |
| Yes (n)                           | 210                | 229         | 49          | 37              | 4    | 6          | 6           | 1       | 22       | 564   |
| % across all OPTs                 | 37.2               | 40.6        | 8.7         | 6.6             | 0.7  | 1.1        | 1.1         | 0.2     | 3.9      |       |
| % within OPT                      | 48.4               | 55.1        | 73.1        | 78.7            | 10.3 | 17.1       | 16.7        | 100.0   | 18.0     |       |
| No (n)                            | 224                | 187         | 18          | 10              | 35   | 29         | 30          | 0       | 100      | 633   |
| % across all OPTs                 | 35.4               | 29.5        | 2.8         | 1.6             | 5.5  | 4.6        | 4.7         | 0.0     | 15.8     |       |
| % within OPT                      | 51.6               | 45.0        | 26.9        | 21.3            | 89.7 | 82.9       | 83.3        | 0.0     | 82.0     |       |
| TOPOGRAPHY                        |                    |             |             |                 |      |            |             |         |          |       |
| No/Low Slope (n)                  | 174                | 222         | 45          | 7               | 32   | 19         | 23          | 1       | 85       | 608   |
| % across all OPTs                 | 28.6               | 36.5        | 7.4         | 1.2             | 5.3  | 3.1        | 3.8         | 0.2     | 14.0     |       |
| % within OPT                      | 40.1               | 53.4        | 67.2        | 14.9            | 82.1 | 54.3       | 63.9        | 100.0   | 69.7     |       |
| Moderate Slope (n)                | 20                 | 7           | 2           | 2               | 3    | 2          | 4           | 0       | 16       | 56    |
| % across all OPTs                 | 35.7               | 12.5        | 3.6         | 3.6             | 5.4  | 3.6        | 7.1         | 0.0     | 28.6     |       |
| % within OPT                      | 4.6                | 1.7         | 3.0         | 4.3             | 7.7  | 5.7        | 11.1        | 0.0     | 13.1     |       |
| Steep Slope (n)                   | 8                  | 6           | 1           | 0               | 1    | 1          | 0           | 0       | 6        | 23    |
| % across all OPTs                 | 34.8               | 26.1        | 4.3         | 0.0             | 4.3  | 4.3        | 0.0         | 0.0     | 26.1     |       |

|                          |             |             |             |             |            |             |             |            |             |             |
|--------------------------|-------------|-------------|-------------|-------------|------------|-------------|-------------|------------|-------------|-------------|
| <i>% within OPT</i>      | <i>1.8</i>  | <i>1.4</i>  | <i>1.5</i>  | <i>0.0</i>  | <i>2.6</i> | <i>2.9</i>  | <i>0.0</i>  | <i>0.0</i> | <i>4.9</i>  |             |
| Uneven Surface (n)       | 232         | 181         | 19          | 38          | 3          | 13          | 9           | 0          | 15          | 510         |
| <i>% across all OPTs</i> | <i>45.5</i> | <i>35.5</i> | <i>3.7</i>  | <i>7.5</i>  | <i>0.6</i> | <i>2.5</i>  | <i>1.8</i>  | <i>0.0</i> | <i>2.9</i>  |             |
| <i>% within OPT</i>      | <i>53.5</i> | <i>43.5</i> | <i>28.4</i> | <i>80.9</i> | <i>7.7</i> | <i>37.1</i> | <i>25.0</i> | <i>0.0</i> | <i>12.3</i> |             |
| <b>Total</b>             | <b>434</b>  | <b>416</b>  | <b>67</b>   | <b>47</b>   | <b>39</b>  | <b>35</b>   | <b>36</b>   | <b>1</b>   | <b>122</b>  | <b>1197</b> |

*OPT = Outdoor Play Type*

**Table S2:** Associations with Outdoor Play Types for Select Demographic & Behavioral Variables using Pearson Chi2 & Fisher's Exact Test

| PHYSICAL PLAY         | Gender     |                 | Age       |                 | CARS (condensed) |                 |            | Risk (condensed) |                 |          | Totals     |
|-----------------------|------------|-----------------|-----------|-----------------|------------------|-----------------|------------|------------------|-----------------|----------|------------|
|                       | Female     | Male            | 0-2 yrs   | 3-8 yrs         | Stationary       | Slow            | ModVig     | No/Low           | Positive        | Negative |            |
| No Count              | 133        | 126             | 20        | 239             | 159              | 73              | 27         | 205              | 54              | 0        | 259        |
| <i>Expected Count</i> | 107.3      | 151.7           | 32.1      | 226.9           | 94.2             | 86.3            | 78.5       | 120.3            | 136.8           | 1.9      |            |
| Yes Count             | 154        | 280             | 66        | 368             | 93               | 158             | 183        | 117              | 312             | 5        | 434        |
| <i>Expected Count</i> | 179.7      | 254.3           | 53.9      | 380.1           | 157.8            | 144.7           | 131.5      | 201.7            | 229.2           | 3.1      |            |
| <b>Total</b>          | <b>287</b> | <b>406</b>      | <b>86</b> | <b>607</b>      | <b>252</b>       | <b>231</b>      | <b>210</b> | <b>322</b>       | <b>366</b>      | <b>5</b> | <b>693</b> |
| Pearson chi2 (p)      | 16.8318    | <b>0.000***</b> | 8.3611    | <b>0.004**</b>  | 130.3137         | <b>0.000***</b> |            | 178.0828         | <b>0.000***</b> |          |            |
| Cramer's V            | 0.1558     |                 | -0.1098   |                 | 0.4324           |                 |            | 0.5069           |                 |          |            |
| Fisher's exact        |            | <b>0.000***</b> |           | <b>0.004**</b>  |                  | <b>0.000***</b> |            |                  | <b>0.000***</b> |          |            |
| EXPLORATORY PLAY      | Gender     |                 | Age       |                 | CARS (condensed) |                 |            | Risk (condensed) |                 |          | Totals     |
|                       | Female     | Male            | 0-2 yrs   | 3-8 yrs         | Stationary       | Slow            | ModVig     | No/Low           | Positive        | Negative |            |
| No                    | 120        | 157             | 34        | 243             | 78               | 69              | 130        | 106              | 167             | 4        | 277        |
| <i>Expected</i>       | 114.7      | 162.3           | 34.4      | 242.6           | 100.7            | 92.3            | 83.9       | 128.7            | 146.3           | 2        |            |
| Yes                   | 167        | 249             | 52        | 364             | 174              | 162             | 80         | 216              | 199             | 1        | 416        |
| <i>Expected</i>       | 172.3      | 243.7           | 51.6      | 364.4           | 151.3            | 138.7           | 126.1      | 193.3            | 219.7           | 3        |            |
| <b>Total</b>          | <b>287</b> | <b>406</b>      | <b>86</b> | <b>607</b>      | <b>252</b>       | <b>231</b>      | <b>210</b> | <b>322</b>       | <b>366</b>      | <b>5</b> | <b>693</b> |
| Pearson chi2 (p)      | 0.6918     | 0.406           | 0.0078    | 0.930           | 60.4703          | <b>0.000***</b> |            | 14.8944          | <b>0.001**</b>  |          |            |
| Cramer's V            | 0.0316     |                 | -0.0034   |                 | 0.2954           |                 |            | 0.1466           |                 |          |            |
| Fisher's exact        |            | 0.431           |           | 1.000           |                  | <b>0.000***</b> |            |                  | <b>0.000***</b> |          |            |
| IMAGINATIVE PLAY      | Gender     |                 | Age       |                 | CARS (condensed) |                 |            | Risk (condensed) |                 |          | Totals     |
|                       | Female     | Male            | 0-2 yrs   | 3-8 yrs         | Stationary       | Slow            | ModVig     | No/Low           | Positive        | Negative |            |
| No                    | 255        | 371             | 86        | 540             | 223              | 207             | 196        | 275              | 346             | 5        | 626        |
| <i>Expected</i>       | 259.3      | 366.7           | 77.7      | 548.3           | 227.6            | 208.7           | 189.7      | 290.9            | 330.6           | 4.5      |            |
| Yes                   | 32         | 35              | 0         | 67              | 29               | 24              | 14         | 47               | 20              | 0        | 67         |
| <i>Expected</i>       | 27.7       | 39.3            | 8.3       | 58.7            | 24.4             | 22.3            | 20.3       | 31.1             | 35.4            | 0.5      |            |
| <b>Total</b>          | <b>287</b> | <b>406</b>      | <b>86</b> | <b>607</b>      | <b>252</b>       | <b>231</b>      | <b>210</b> | <b>322</b>       | <b>366</b>      | <b>5</b> | <b>693</b> |
| Pearson chi2 (p)      | 1.2315     | 0.267           | 10.5086   | <b>0.001**</b>  | 3.2806           | 0.194           |            | 16.8951          | <b>0.000***</b> |          |            |
| Cramer's V            | -0.0422    |                 | 0.1231    |                 | 0.0688           |                 |            | 0.1561           |                 |          |            |
| Fisher's exact        |            | 0.297           |           | <b>0.000***</b> |                  | 0.183           |            |                  | <b>0.000***</b> |          |            |
| PLAY W RULES          | Gender     |                 | Age       |                 | CARS (condensed) |                 |            | Risk (condensed) |                 |          | Totals     |
|                       | Female     | Male            | 0-2 yrs   | 3-8 yrs         | Stationary       | Slow            | ModVig     | No/Low           | Positive        | Negative |            |
| No                    | 278        | 368             | 86        | 560             | 245              | 214             | 187        | 314              | 327             | 5        | 646        |
| <i>Expected</i>       | 267.5      | 378.5           | 80.2      | 565.8           | 234.9            | 215.3           | 195.8      | 300.2            | 341.2           | 4.7      |            |
| Yes                   | 9          | 38              | 0         | 47              | 7                | 17              | 23         | 8                | 39              | 0        | 47         |
| <i>Expected</i>       | 19.5       | 27.5            | 5.8       | 41.2            | 17.1             | 15.7            | 14.2       | 21.8             | 24.8            | 0.3      |            |
| <b>Total</b>          | <b>287</b> | <b>406</b>      | <b>86</b> | <b>607</b>      | <b>252</b>       | <b>231</b>      | <b>210</b> | <b>322</b>       | <b>366</b>      | <b>5</b> | <b>693</b> |
| Pearson chi2 (p)      | 10.3017    | <b>0.001**</b>  | 7.1435    | <b>0.008**</b>  | 12.2899          | <b>0.002**</b>  |            | 18.4574          | <b>0.000***</b> |          |            |
| Cramer's V            | 0.1219     |                 | 0.1015    |                 | 0.1332           |                 |            | 0.1632           |                 |          |            |
| Fisher's exact        |            | <b>0.001**</b>  |           | <b>0.002**</b>  |                  | <b>0.002**</b>  |            |                  | <b>0.000***</b> |          |            |

| BIO PLAY         | Gender  |          | Age     |         | CARS (condensed) |          |        | Risk (condensed) |          |          | Totals |
|------------------|---------|----------|---------|---------|------------------|----------|--------|------------------|----------|----------|--------|
|                  | Female  | Male     | 0-2 yrs | 3-8 yrs | Stationary       | Slow     | ModVig | No/Low           | Positive | Negative |        |
| No               | 268     | 386      | 85      | 569     | 221              | 225      | 208    | 287              | 362      | 5        | 654    |
| Expected         | 270.8   | 383.2    | 81.2    | 572.8   | 237.8            | 218      | 198.2  | 303.9            | 345.4    | 4.7      |        |
| Yes              | 19      | 20       | 1       | 38      | 31               | 6        | 2      | 35               | 4        | 0        | 39     |
| Expected         | 16.2    | 22.8     | 4.8     | 34.2    | 14.2             | 13       | 11.8   | 18.1             | 20.6     | 0.3      |        |
| Total            | 287     | 406      | 86      | 607     | 252              | 231      | 210    | 322              | 366      | 5        | 693    |
| Pearson chi2 (p) | 0.9086  | 0.340    | 3.6855  | 0.055+  | 33.771           | 0.000*** |        | 31.129           | 0.000*** |          |        |
| Cramer's V       | -0.0362 |          | 0.0729  |         | 0.2208           |          |        | 0.2119           |          |          |        |
| Fisher's exact   |         | 0.403    |         | 0.075   |                  | 0.000*** |        |                  | 0.000*** |          |        |
| EXPRESSIVE PLAY  | Gender  |          | Age     |         | CARS (condensed) |          |        | Risk (condensed) |          |          | Totals |
|                  | Female  | Male     | 0-2 yrs | 3-8 yrs | Stationary       | Slow     | ModVig | No/Low           | Positive | Negative |        |
| No               | 262     | 396      | 84      | 574     | 228              | 228      | 202    | 297              | 356      | 5        | 658    |
| Expected         | 272.5   | 385.5    | 81.7    | 576.3   | 239.3            | 219.3    | 199.4  | 305.7            | 347.5    | 4.7      |        |
| Yes              | 25      | 10       | 2       | 33      | 24               | 3        | 8      | 25               | 10       | 0        | 35     |
| Expected         | 14.5    | 20.5     | 4.3     | 30.7    | 12.7             | 11.7     | 10.6   | 16.3             | 18.5     | 0.3      |        |
| Total            | 287     | 406      | 86      | 607     | 252              | 231      | 210    | 322              | 366      | 5        | 693    |
| Pearson chi2 (p) | 13.6866 | 0.000*** | 1.5203  | 0.218   | 17.9705          | 0.000*** |        | 9.3118           | 0.01*    |          |        |
| Cramer's V       | -0.1405 |          | 0.0468  |         | 0.161            |          |        | 0.1159           |          |          |        |
| Fisher's exact   |         | 0.000*** |         | 0.296   |                  | 0.000*** |        |                  | 0.008**  |          |        |
| RESTORATIVE PLAY | Gender  |          | Age     |         | CARS (condensed) |          |        | Risk (condensed) |          |          | Totals |
|                  | Female  | Male     | 0-2 yrs | 3-8 yrs | Stationary       | Slow     | ModVig | No/Low           | Positive | Negative |        |
| No               | 265     | 392      | 81      | 576     | 222              | 226      | 209    | 295              | 357      | 5        | 657    |
| Expected         | 272.1   | 384.9    | 81.5    | 575.5   | 238.9            | 219      | 199.1  | 305.3            | 347      | 4.7      |        |
| Yes              | 22      | 14       | 5       | 31      | 30               | 5        | 1      | 27               | 9        | 0        | 36     |
| Expected         | 14.9    | 21.1     | 4.5     | 31.5    | 13.1             | 12       | 10.9   | 16.7             | 19       | 0.3      |        |
| Total            | 287     | 406      | 86      | 607     | 252              | 231      | 210    | 322              | 366      | 5        | 693    |
| Pearson chi2 (p) | 6.0719  | 0.014*   | 0.0764  | 0.782   | 36.8387          | 0.000*** |        | 12.4906          | 0.002**  |          |        |
| Cramer's V       | -0.0936 |          | -0.0105 |         | 0.2306           |          |        | 0.1343           |          |          |        |
| Fisher's exact   |         | 0.015*   |         | 0.796   |                  | 0.000*** |        |                  | 0.002**  |          |        |
| DIGITAL PLAY     | Gender  |          | Age     |         | CARS (condensed) |          |        | Risk (condensed) |          |          | Totals |
|                  | Female  | Male     | 0-2 yrs | 3-8 yrs | Stationary       | Slow     | ModVig | No/Low           | Positive | Negative |        |
| No               | 287     | 405      | 86      | 606     | 251              | 231      | 210    | 321              | 366      | 5        | 692    |
| Expected         | 286.6   | 405.4    | 85.9    | 606.1   | 251.6            | 230.7    | 209.7  | 321.5            | 365.5    | 5        |        |
| Yes              | 0       | 1        | 0       | 1       | 1                | 0        | 0      | 1                | 0        | 0        | 1      |
| Expected         | 0.4     | 0.6      | 0.1     | 0.9     | 0.4              | 0.3      | 0.3    | 0.5              | 0.5      | 0        |        |
| Total            | 287     | 406      | 86      | 609     | 252              | 231      | 210    | 322              | 366      | 5        | 693    |
| Pearson chi2 (p) | 0.7079  | 0.400    | 0.1419  | 0.706   | 1.7525           | 0.416    |        | 1.1538           | 0.562    |          |        |
| Cramer's V       | 0.032   |          | 0.0143  |         | 0.0503           |          |        | 0.0408           |          |          |        |
| Fisher's exact   |         | 1.000    |         | 1.000   |                  | 1.000    |        |                  | 0.472    |          |        |

| NON PLAY         | Gender        |                 | Age            |                | CARS (condensed)  |                 |               | Risk (condensed) |                 |                 | Totals     |
|------------------|---------------|-----------------|----------------|----------------|-------------------|-----------------|---------------|------------------|-----------------|-----------------|------------|
|                  | <i>Female</i> | <i>Male</i>     | <i>0-2 yrs</i> | <i>3-8 yrs</i> | <i>Stationary</i> | <i>Slow</i>     | <i>ModVig</i> | <i>No/Low</i>    | <i>Positive</i> | <i>Negative</i> |            |
| No               | 219           | 352             | 68             | 503            | 190               | 206             | 175           | 219              | 347             | 5               | 571        |
| <i>Expected</i>  | 236.5         | 334.5           | 70.9           | 500.1          | 207.6             | 190.3           | 173           | 265.3            | 301.6           | 4.1             |            |
| Yes              | 68            | 54              | 18             | 104            | 62                | 25              | 35            | 103              | 19              | 0               | 122        |
| <i>Expected</i>  | 50.5          | 71.5            | 15.1           | 106.9          | 44.4              | 40.7            | 37            | 56.7             | 64.4            | 0.9             |            |
| <b>Total</b>     | <b>287</b>    | <b>406</b>      | <b>86</b>      | <b>607</b>     | <b>252</b>        | <b>231</b>      | <b>210</b>    | <b>322</b>       | <b>366</b>      | <b>5</b>        | <b>693</b> |
| Pearson chi2 (p) | 12.5204       | <b>0.000***</b> | 0.7486         | 0.387          | 15.9616           | <b>0.000***</b> |               | 85.8709          | <b>0.000***</b> |                 |            |
| Cramer's V       | -0.1344       |                 | -0.0329        |                | 0.1518            |                 |               | 0.352            |                 |                 |            |
| Fisher's exact   |               | <b>0.001**</b>  |                | 0.368          |                   | <b>0.000***</b> |               |                  | <b>0.000***</b> |                 |            |

+ p ~ 0.05

\*\* p< 0.01

\* p < 0.05

\*\*\*p<0.001
